# Supplementary material
Source: PubMed Central journal article supplement (PMC5084895)

## Supplemental Material

**Supplemental Table 1** – Spearman’s rank correlation between serum phenylacetylglutamine and baseline characteristics

| Variable                      | $\rho$ | $P$     |
|-------------------------------|--------|---------|
| Age                           | 0.42   | < 0.001 |
| Gender (female vs. male)      | 0.01   | 0.86    |
| Prior CVD                     | 0.21   | < 0.001 |
| Diabetes mellitus             | 0.24   | < 0.001 |
| Current smoker                | - 0.08 | 0.08    |
| Body mass index               | 0.02   | 0.70    |
| Systolic blood pressure       | 0.17   | < 0.001 |
| Diastolic blood pressure      | - 0.04 | 0.37    |
| Hemoglobin                    | - 0.44 | < 0.001 |
| Albumin                       | - 0.22 | < 0.001 |
| C-reactive protein            | 0.13   | 0.006   |
| Cholesterol                   | - 0.17 | < 0.001 |
| LDL                           | - 0.15 | 0.001   |
| HDL                           | - 0.10 | 0.02    |
| Calcium                       | - 0.02 | 0.69    |
| Phosphate                     | 0.38   | < 0.001 |
| Parathormone                  | 0.51   | < 0.001 |
| Creatinine                    | 0.73   | < 0.001 |
| eGFR                          | - 0.76 | < 0.001 |
| Therapy with ACEI/ARB         | 0.01   | 0.84    |
| Therapy with statin           | 0.13   | 0.004   |
| Therapy with 25-OH-vitamin D  | 0.22   | < 0.001 |
| Therapy with phosphate binder | 0.32   | < 0.001 |

CVD, cardiovascular disease; LDL, low-density lipoprotein; HDL, high-density lipoprotein; eGFR, estimated glomerular filtration rate; ACEI, angiotensin-converting enzyme inhibitor; ARB, angiotensin receptor blocker; ; 25-OH-vitamin D, 25-hydroxy-vitamine D

**Supplemental Table 2** – Multivariate regression analysis: Factors associated with serum phenylacetylglutamine (Ln)

| Variable                    | Unit                       | $\beta$ | Standardized $\beta$ | <i>P</i> |
|-----------------------------|----------------------------|---------|----------------------|----------|
| Age                         | y                          | 0.008   | 0.12                 | < 0.001  |
| Body mass index             | kg/m <sup>2</sup>          | - 0.01  | - 0.06               | 0.04     |
| Hemoglobin                  | g/dL                       | - 0.05  | - 0.08               | 0.03     |
| Albumin                     | g/L                        | - 0.02  | - 0.07               | 0.02     |
| eGFR (Ln)                   | ml/min/1.73 m <sup>2</sup> | - 1.26  | - 0.66               | < 0.001  |
| Model <i>R</i> <sup>2</sup> |                            |         |                      | 0.59     |

eGFR, estimated glomerular filtration rate

**Supplemental Table 3 – Cause of death**

| Cause ( <i>n</i> = 51) | <i>n</i> (%) |
|------------------------|--------------|
| Cardiovascular         | 16 (31.4 %)  |
| Malignancy             | 14 (27.5 %)  |
| Infectious             | 3 (5.9 %)    |
| Other                  | 18 (35.3 %)  |

**Supplemental Table 4 – Cardiovascular events**

| Events ( <i>n</i> = 75)           | <i>n</i> (%) |
|-----------------------------------|--------------|
| <i>Non-fatal</i>                  | 64 (85.3 %)  |
| Cardiac                           | 28 (37.3 %)  |
| New onset angina, conservative    | 10 (13.3 %)  |
| New onset angina, invasive        | 6 (8.0 %)    |
| Acute myocardial infarction       | 10 (13.3 %)  |
| Ventricular arrhythmia            | 2 (2.7 %)    |
| Ischemic cerebrovascular accident | 5 (6.7 %)    |
| Peripheral arterial disease       | 31 (41.3 %)  |
| <i>Fatal</i>                      | 11 (14.7 %)  |

## Supplemental Figure 1 – Patient inclusion

Flow chart demonstrating patient screening and inclusion.

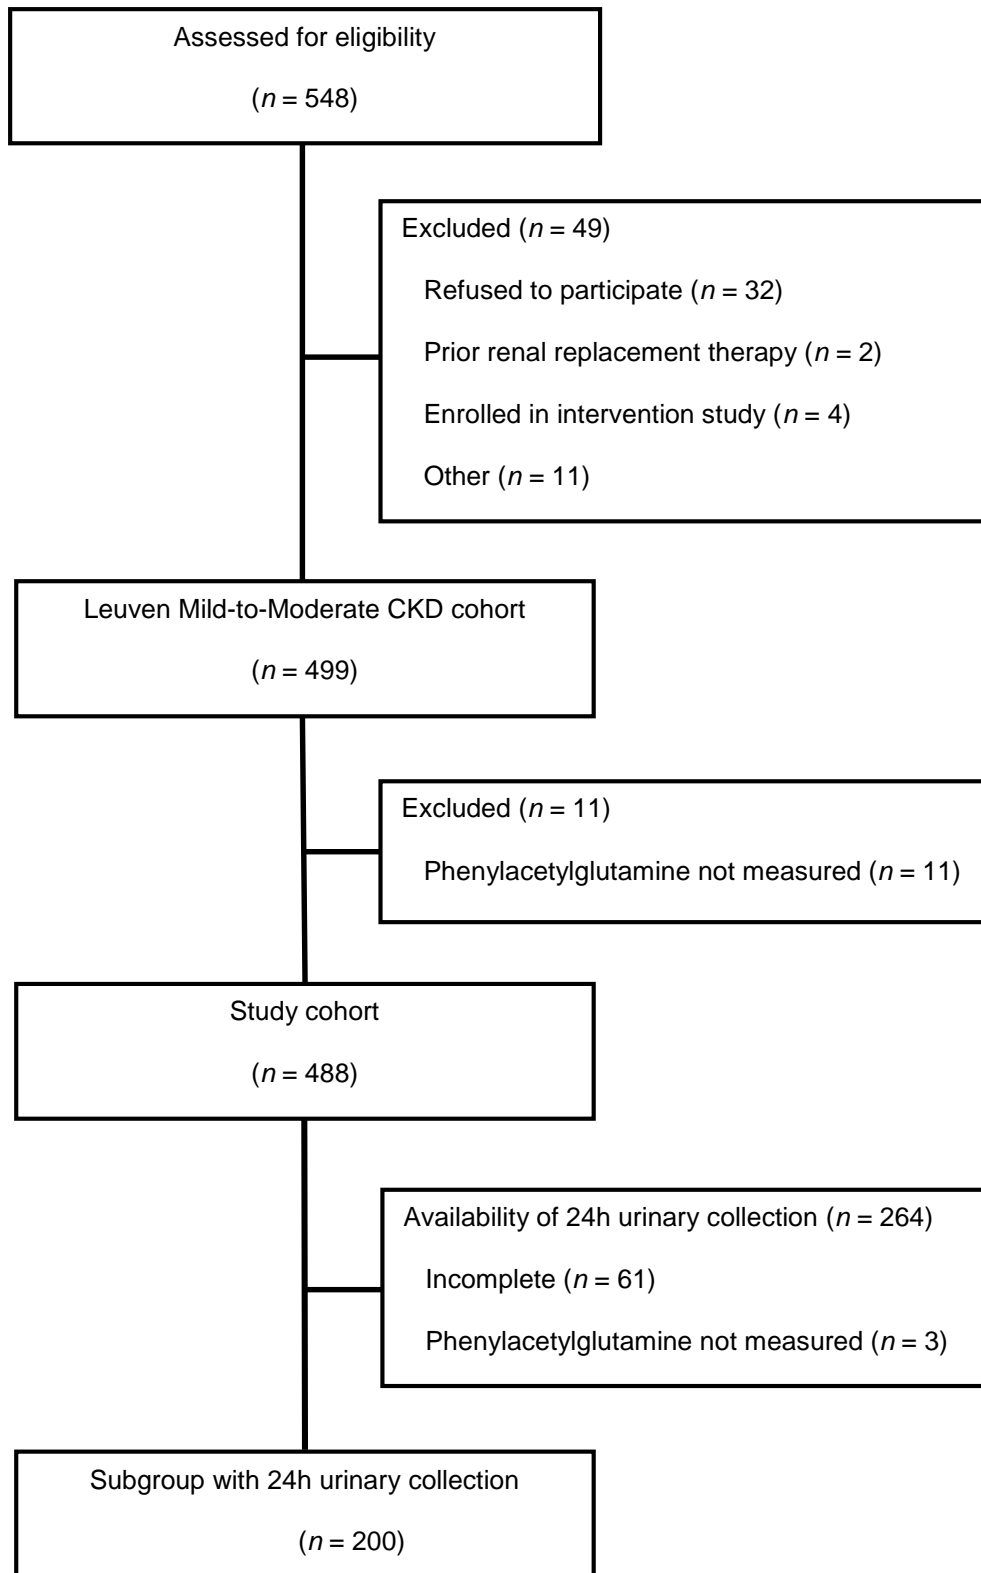

**Supplemental Figure 2** – Relationship between natural logarithmic transformed serum phenylacetylglutamine, eGFR, renal clearance of phenylacetylglutamine and 24h urinary excretion of phenylacetylglutamine ( $n = 200$ )

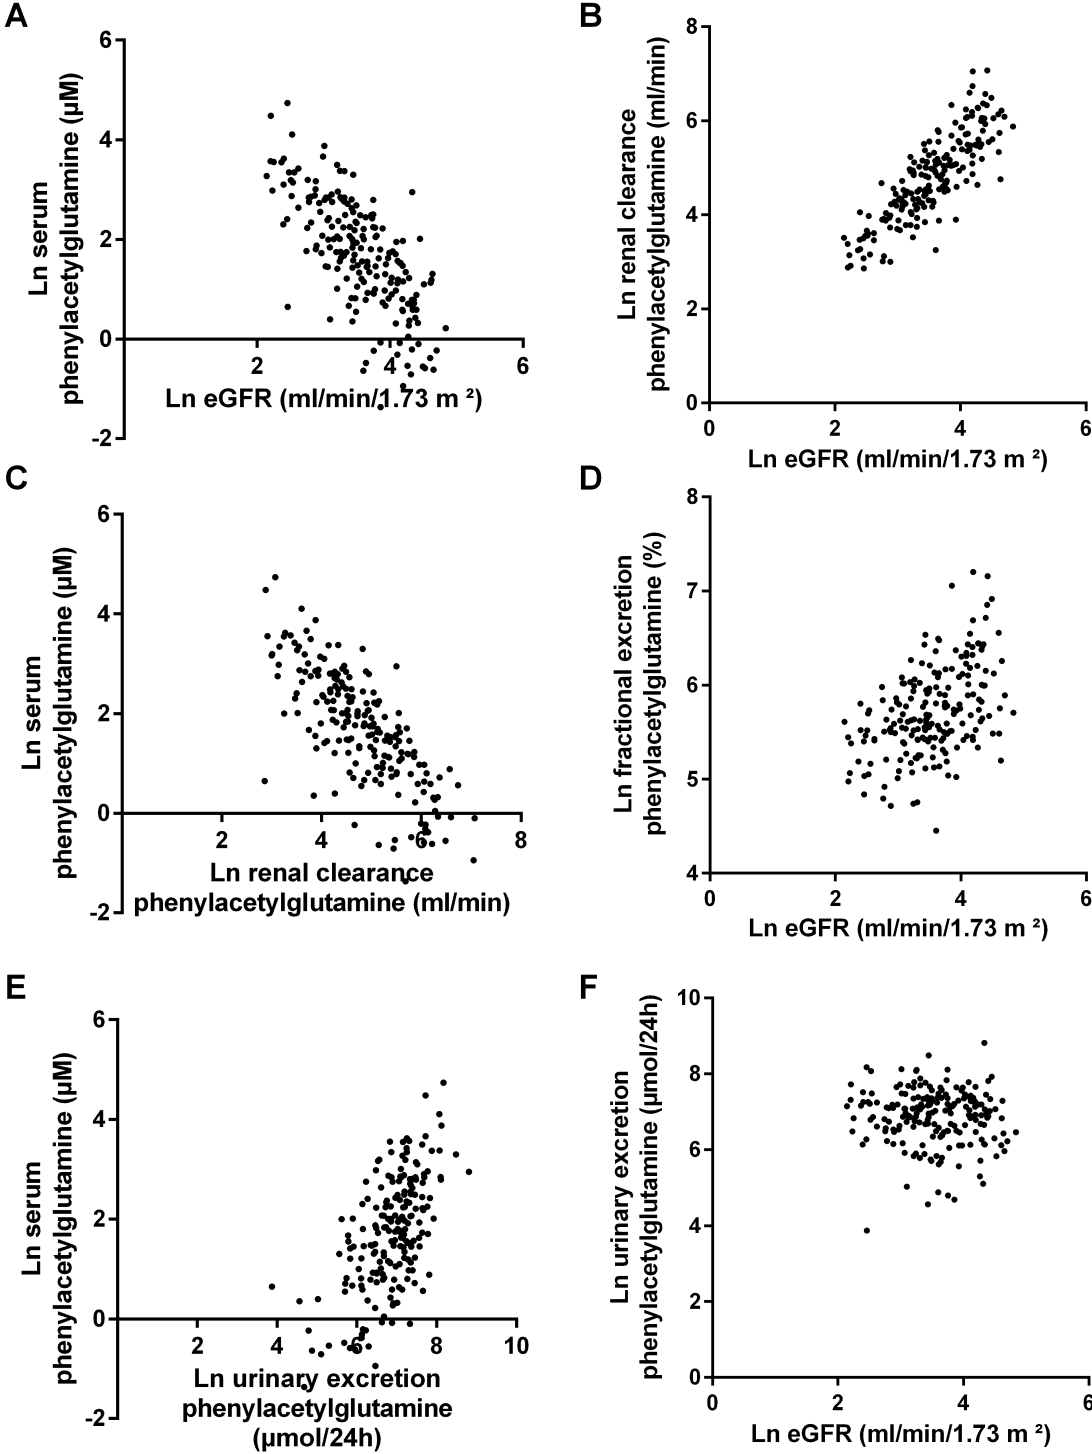

Supplement: ASN.2015121302SupplementaryData.pdf [file ASN.2015121302SupplementaryData.pdf]
